# Supplementary material for: Antigenic Evolution Characteristics and Immunological Evaluation of H9N2 Avian Influenza Viruses from 1994–2019 in China
Source: MDPI journal article supplement (doi:10.3390/v14040726), 2022-03-30
Supplement: s1 [file s1]

## Supplementary Materials

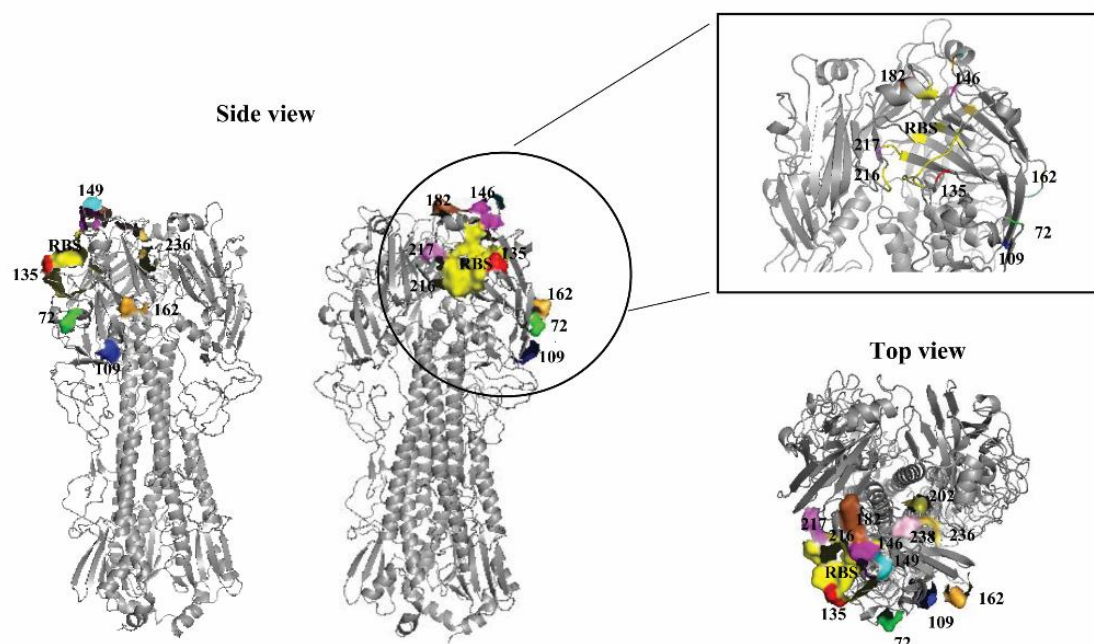

**Figure S1.** Position of the selected amino acids in HA 3D trimer structure. The 3D structure of the HA protein trimer was drawn with PyMOL. The receptor binding site was yellow. Position 72 was marked as green, position 109 was blue, position 135 was red, position 146 was purple, position 149 was cyan, position 162 was deep brown, position 182 was brown, position 202 was deep olive, position 216 was deep blue, position 217 was violet, position 236 was yellow orange, position 238 was light pink.

**Table S1.** The branches of H9N2 HA proteins each year in China from 1994 to 2019.

| Year | Total Number | Clade    |          |          |          |          |          |         |
|------|--------------|----------|----------|----------|----------|----------|----------|---------|
|      |              | h9.4.2.1 | h9.4.2.2 | h9.4.2.3 | h9.4.2.4 | h9.4.2.5 | h9.4.2.6 | Unknown |
| 1994 | 2            | 0        | 2        | 0        | 0        | 0        | 0        | 0       |
| 1995 | 0            | 0        | 0        | 0        | 0        | 0        | 0        | 0       |
| 1996 | 6            | 2        | 4        | 0        | 0        | 0        | 0        | 0       |
| 1997 | 7            | 1        | 3        | 2        | 0        | 0        | 0        | 1       |
| 1998 | 16           | 5        | 1        | 1        | 4        | 0        | 0        | 4       |
| 1999 | 22           | 5        | 2        | 7        | 8        | 0        | 0        | 0       |
| 2000 | 32           | 5        | 0        | 6        | 17       | 2        | 0        | 2       |
| 2001 | 40           | 3        | 5        | 14       | 14       | 3        | 0        | 1       |
| 2002 | 23           | 5        | 1        | 3        | 10       | 4        | 0        | 0       |
| 2003 | 19           | 2        | 4        | 3        | 4        | 5        | 0        | 1       |
| 2004 | 12           | 0        | 2        | 1        | 7        | 0        | 0        | 2       |
| 2005 | 27           | 0        | 0        | 17       | 4        | 3        | 0        | 3       |
| 2006 | 25           | 0        | 0        | 4        | 10       | 10       | 0        | 1       |
| 2007 | 107          | 1        | 1        | 6        | 36       | 57       | 0        | 6       |
| 2008 | 57           | 4        | 0        | 2        | 23       | 26       | 0        | 2       |
| 2009 | 94           | 0        | 0        | 1        | 5        | 85       | 1        | 2       |

|      |      |    |    |    |     |      |    |    |
|------|------|----|----|----|-----|------|----|----|
| 2010 | 154  | 1  | 0  | 2  | 3   | 136  | 10 | 2  |
| 2011 | 224  | 1  | 0  | 5  | 2   | 149  | 59 | 8  |
| 2012 | 156  | 2  | 0  | 1  | 0   | 125  | 11 | 17 |
| 2013 | 456  | 5  | 0  | 1  | 1   | 439  | 4  | 7  |
| 2014 | 204  | 0  | 0  | 0  | 0   | 196  | 1  | 7  |
| 2015 | 548  | 0  | 0  | 0  | 0   | 547  | 1  | 0  |
| 2016 | 738  | 1  | 0  | 0  | 0   | 736  | 1  | 0  |
| 2017 | 742  | 2  | 0  | 0  | 1   | 738  | 0  | 1  |
| 2018 | 1402 | 0  | 0  | 0  | 0   | 1402 | 0  | 0  |
| 2019 | 25   | 0  | 0  | 0  | 0   | 25   | 0  | 0  |
| Sum  | 5138 | 40 | 25 | 76 | 149 | 4688 | 88 | 67 |

**Table S2.** The space dynamics of the H9N2 HA protein in China from 1994 to 2019.

| Province       | Total Number | Clade    |          |          |          |          |          |         |
|----------------|--------------|----------|----------|----------|----------|----------|----------|---------|
|                |              | h9.4.2.1 | h9.4.2.2 | h9.4.2.3 | h9.4.2.4 | h9.4.2.5 | h9.4.2.6 | Unknown |
| Jiangxi        | 797          | 0        | 0        | 3        | 13       | 780      | 0        | 1       |
| Jiangsu        | 603          | 19       | 7        | 6        | 2        | 563      | 0        | 6       |
| Guizhou        | 520          | 0        | 0        | 0        | 0        | 515      | 5        | 0       |
| Guangdong      | 505          | 4        | 3        | 5        | 11       | 523      | 62       | 3       |
| Shandong       | 396          | 3        | 5        | 9        | 38       | 336      | 0        | 5       |
| Shanghai       | 378          | 5        | 0        | 13       | 9        | 347      | 2        | 2       |
| Zhejiang       | 237          | 1        | 0        | 0        | 0        | 236      | 0        | 0       |
| Anhui          | 231          | 1        | 0        | 0        | 3        | 218      | 4        | 5       |
| Yunnan         | 225          | 0        | 0        | 3        | 10       | 210      | 2        | 0       |
| Hubei          | 195          | 1        | 0        | 0        | 2        | 191      | 1        | 0       |
| Ningxia        | 181          | 0        | 0        | 0        | 1        | 180      | 0        | 0       |
| Fujian         | 171          | 2        | 2        | 0        | 3        | 162      | 2        | 0       |
| Guangxi        | 166          | 0        | 0        | 25       | 8        | 122      | 5        | 6       |
| Qinghai        | 110          | 0        | 0        | 0        | 0        | 110      | 0        | 0       |
| Hunan          | 94           | 0        | 0        | 0        | 1        | 69       | 1        | 23      |
| Xizang         | 85           | 0        | 0        | 0        | 0        | 85       | 0        | 0       |
| Henan          | 68           | 1        | 0        | 10       | 15       | 40       | 0        | 2       |
| Beijing        | 40           | 0        | 2        | 0        | 3        | 30       | 0        | 5       |
| Hebei          | 37           | 2        | 1        | 0        | 12       | 18       | 0        | 4       |
| Sichuan        | 23           | 0        | 0        | 0        | 2        | 20       | 0        | 1       |
| Jilin          | 13           | 0        | 0        | 0        | 3        | 9        | 1        | 0       |
| Liaoning       | 13           | 0        | 0        | 0        | 4        | 7        | 2        | 0       |
| Tianjin        | 11           | 0        | 2        | 0        | 0        | 9        | 0        | 0       |
| Heilongjiang   | 9            | 1        | 1        | 0        | 2        | 3        | 0        | 2       |
| Shanxi         | 8            | 0        | 0        | 0        | 0        | 8        | 0        | 0       |
| Xinjiang       | 6            | 0        | 0        | 0        | 0        | 6        | 0        | 0       |
| Chongqing      | 4            | 0        | 0        | 0        | 0        | 4        | 0        | 0       |
| Shaanxi        | 3            | 0        | 0        | 0        | 0        | 3        | 0        | 0       |
| Hainan         | 3            | 0        | 0        | 0        | 0        | 2        | 1        | 0       |
| Gansu          | 3            | 1        | 0        | 0        | 1        | 1        | 0        | 0       |
| Taiwan         | 3            | 0        | 0        | 0        | 0        | 3        | 0        | 0       |
| Inner Mongolia | 0            | 0        | 0        | 0        | 0        | 0        | 0        | 0       |

**Table S3.** The different amino acids of HA sequences around 2006.

| Group               | Residue (H9 numbering) |   |       |   |       |   |       |   |        |   |       |   |       |   |       |   |       |   |       |   |       |   |       |   |
|---------------------|------------------------|---|-------|---|-------|---|-------|---|--------|---|-------|---|-------|---|-------|---|-------|---|-------|---|-------|---|-------|---|
|                     | 72                     |   | 109   |   | 135   |   | 146   |   | 149    |   | 162   |   | 182   |   | 202   |   | 216   |   | 217   |   | 236   |   | 238   |   |
| 1994-2006<br>(230)  | E                      | G | R     | S | G     | D | R     | Q | G      | N | Q     | R | R     | T | I     | T | L     | Q | M     | Q | K     | R | D     | N |
|                     | 0.9%                   |   | 1.3%  |   | 0.4%  |   | 0%    |   | 0.4%   |   | 3.1%  |   | 0%    |   | 0%    |   | 44.3% |   | 0%    |   | 0.9%  |   | 7.9%  |   |
|                     | 98.7%                  |   | 96.9% |   | 97.4% |   | 95.6% |   | 98.7%  |   | 93.0% |   | 97.8% |   | 99.1% |   | 53.9% |   | 99.1% |   | 99.1% |   | 91.7% |   |
| 2007-2019<br>(4910) | E                      | G | R     | S | G     | D | R     | Q | G      | N | Q     | R | R     | T | I     | T | L     | Q | M     | Q | K     | R | D     | N |
|                     | 64.4%                  |   | 86.2% |   | 55.2% |   | 56.7  |   | 59.6%  |   | 92.4% |   | 53.7% |   | 73.4% |   | 97.0% |   | 85.8% |   | 81.9% |   | 77.8% |   |
|                     | 35.2%                  |   | 10.7% |   | 39.0% |   | 41.3% |   | 37.2.% |   | 6.2%  |   | 38.7% |   | 20.4% |   | 2.8%  |   | 14.0% |   | 17.6% |   | 21.9% |   |
| GX/55               | G                      |   | S     |   | D     |   | Q     |   | N      |   | R     |   | T     |   | T     |   | L     |   | Q     |   | R     |   | N     |   |
| 18325               | E                      |   | R     |   | G     |   | R     |   | G      |   | Q     |   | R     |   | I     |   | L     |   | M     |   | K     |   | D     |   |
| 19027               | E                      |   | R     |   | S     |   | R     |   | G      |   | Q     |   | R     |   | I     |   | L     |   | M     |   | K     |   | D     |   |
| 19166               | E                      |   | R     |   | G     |   | R     |   | G      |   | Q     |   | R     |   | I     |   | L     |   | M     |   | K     |   | D     |   |

**Table S4.** Results of cross hemagglutination inhibition test.

| Strains   | Antiserum   |          |      |       |      |      |      |       |       |
|-----------|-------------|----------|------|-------|------|------|------|-------|-------|
|           | Mut-Mut/PR8 | R-WT/PR8 | WJ57 | 18325 | HN98 | F98  | SD96 | 19027 | 19166 |
| R-Mut/PR8 | 2048        | 256      | 128  | 128   | 256  | 512  | 32   | 256   | 512   |
| R-WT/PR8  | 32          | 1024     | 1024 | 8     | 1024 | 2048 | 256  | 8     | 8     |
| WJ57      | 128         | 2048     | 2048 | 64    | 1024 | 2048 | 256  | 64    | 64    |
| 18325     | 512         | 256      | 512  | 4096  | 256  | 512  | 128  | 2048  | 2048  |
| HN98      | 4           | 256      | 512  | 4     | 256  | 256  | 32   | 4     | 4     |
| F98       | 128         | 1024     | 2048 | 64    | 1024 | 4096 | 256  | 32    | 64    |
| SD96      | 16          | 256      | 512  | 8     | 256  | 512  | 256  | 8     | 8     |
| 19027     | 256         | 128      | 64   | 1024  | 256  | 512  | 128  | 4096  | 1024  |
| 19166     | 256         | 32       | 64   | 256   | 128  | 128  | 64   | 1024  | 4096  |
